# Supplementary material for: Survey of Medical Student Empathy at a Canadian Medical School
Source: Research Square preprint supplement (doi:10.21203/rs.3.rs-119795/v1), 2020-12-08
Supplement: Supplementary file 1 [file 68b54aa331561176d1ee32fa.docx]

Table 1: Number of responses per year

Table 2: Mean questionnaire score by gender

Table 3: Mean questionnaire score by age

Table 4: Mean questionnaire score by specialty interest

Table 5: Mean questionnaire score by year in medical school
